# Supplementary material for: Enhancer-associated long non-coding RNA LEENE regulates endothelial nitric oxide synthase and endothelial function
Source: PubMed Central journal article supplement (PMC5773557; doi:10.1038/s41467-017-02113-y), 2018-01-18
Supplement: 41467_2017_2113_MOESM1_ESM.pdf [file 41467_2017_2113_MOESM1_ESM.pdf]

# Supplementary Figure 1

## Subcellular quantitation for lncRNAs DANCR, Casc7, and TUG1

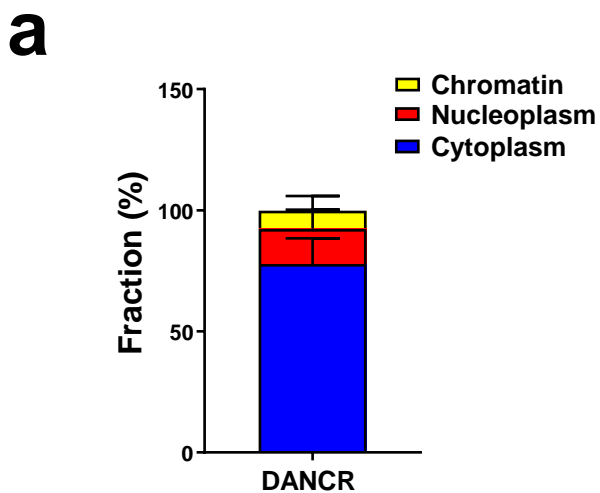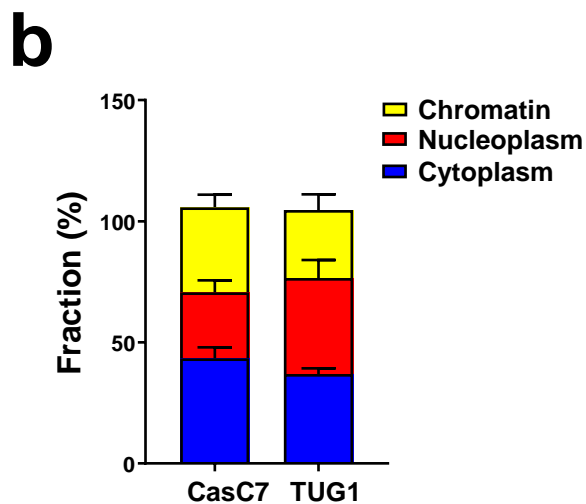

**Supplementary Figure 1:** qPCR quantitation of DANCR (a), CasC7, and TUG1 (b) in subcellular fractions from ECs, plotted as percentages in association with chromatin, nucleoplasm, and cytoplasm. Data are presented as mean $\pm$ SEM. ANOVA followed by Bonferroni post-test is applied. n=5/group.

## Supplementary Figure 2

### Transcription of *LEENE* neighboring genes

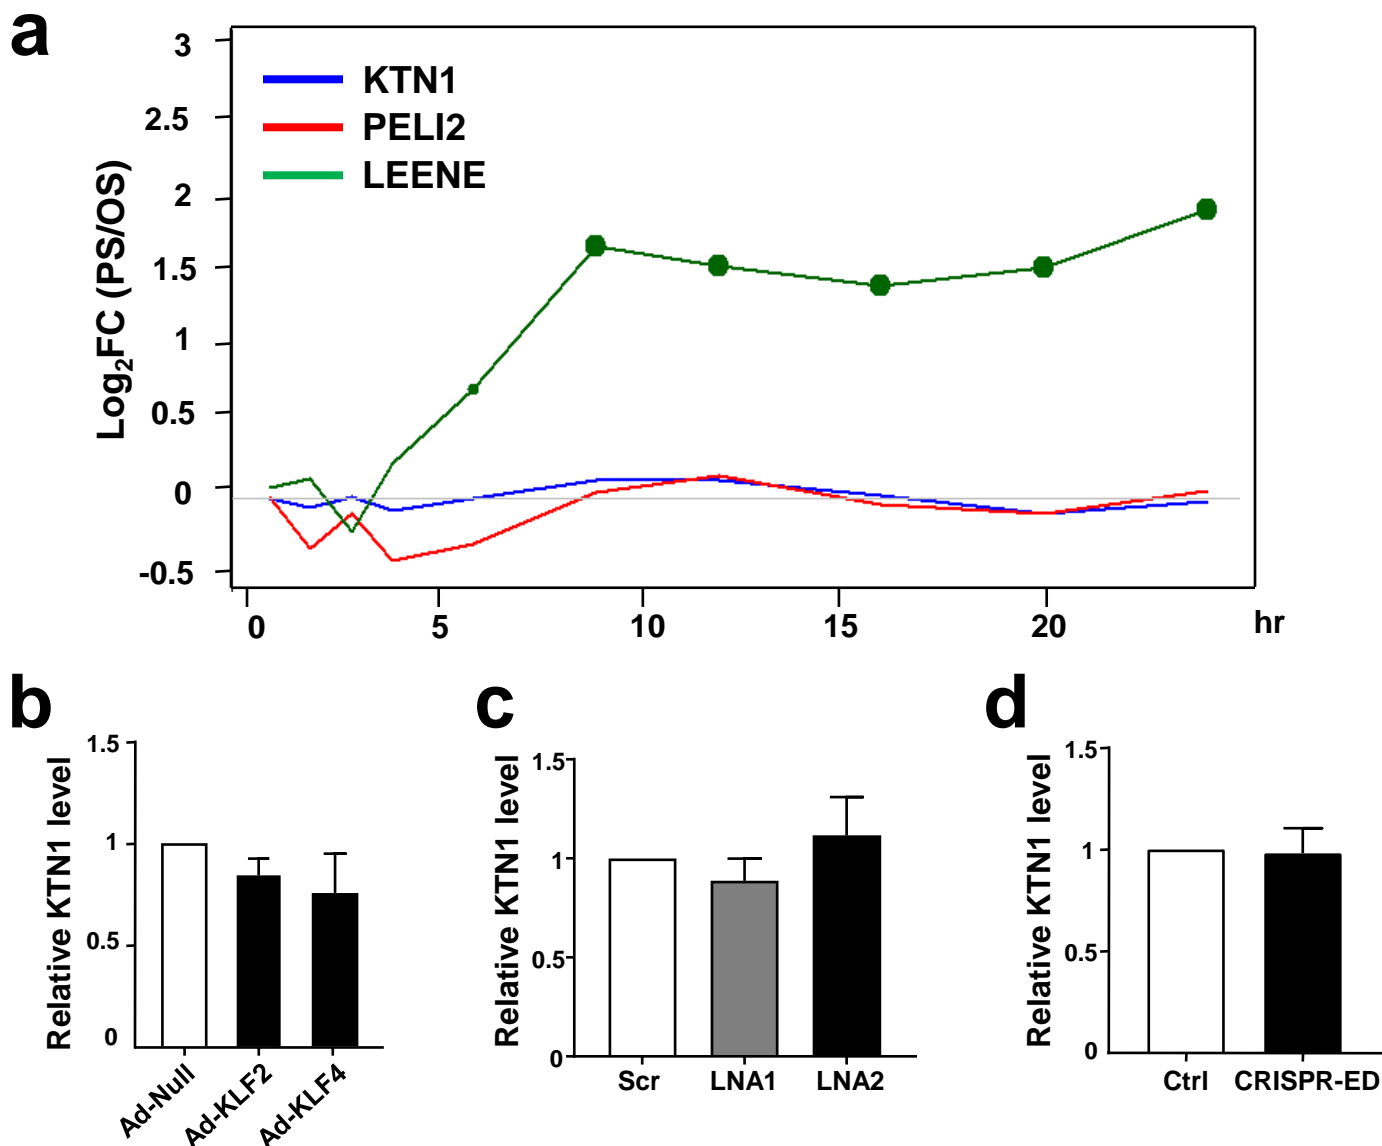

**Supplementary Figure 2:** (a) Time course of  $\log_2FC$  (PS/OS) of *LEENE* and mRNAs encoding *KTN1* and *PELI2*. (b-d) qPCR quantification of *KTN1* in ECs with (b) *KLF2* or *KLF4* overexpression, (c) *LEENE* knock-down with two different gapmer-LNA (50 nM), or (d) CRISPR-cas9 gene editing targeting *LEENE* promoter/enhancer regions. Data are presented as mean  $\pm$  SEM. ANOVA followed by Bonferroni post-test is applied,  $n=5$ /group.

# Supplementary Figure 3

## Heatmap of flow-regulated 81 genes in *LEENE* interactome

Log<sub>2</sub> FC (PS/OS)

+1 0 -1

eNOS

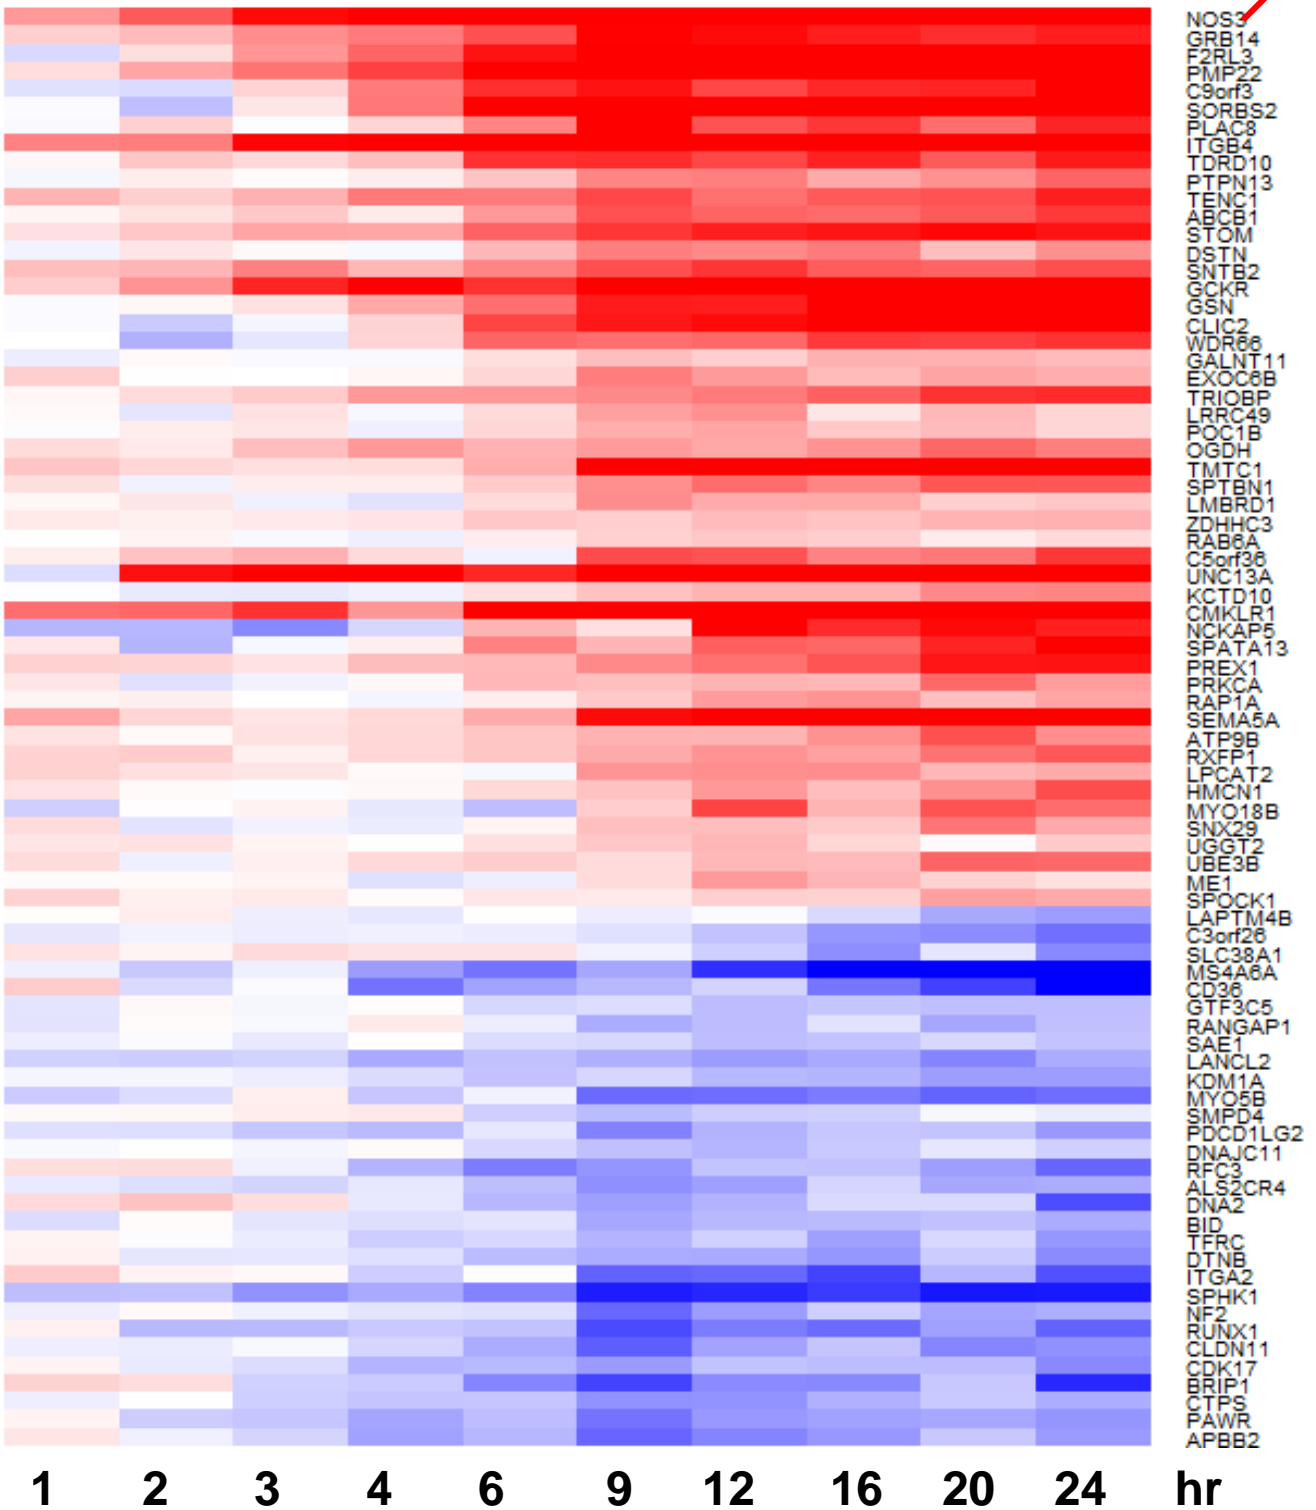

**Supplementary Figure 3:** Heatmap demonstrates the flow-regulated 81 genes in the *LEENE* interactome in Fig. 3d, with eNOS as one of the top correlated transcripts with *LEENE*.

## Supplementary Figure 4

### Hi-C analysis of *LEENE*-*eNOS* interaction map in non-EC cell types

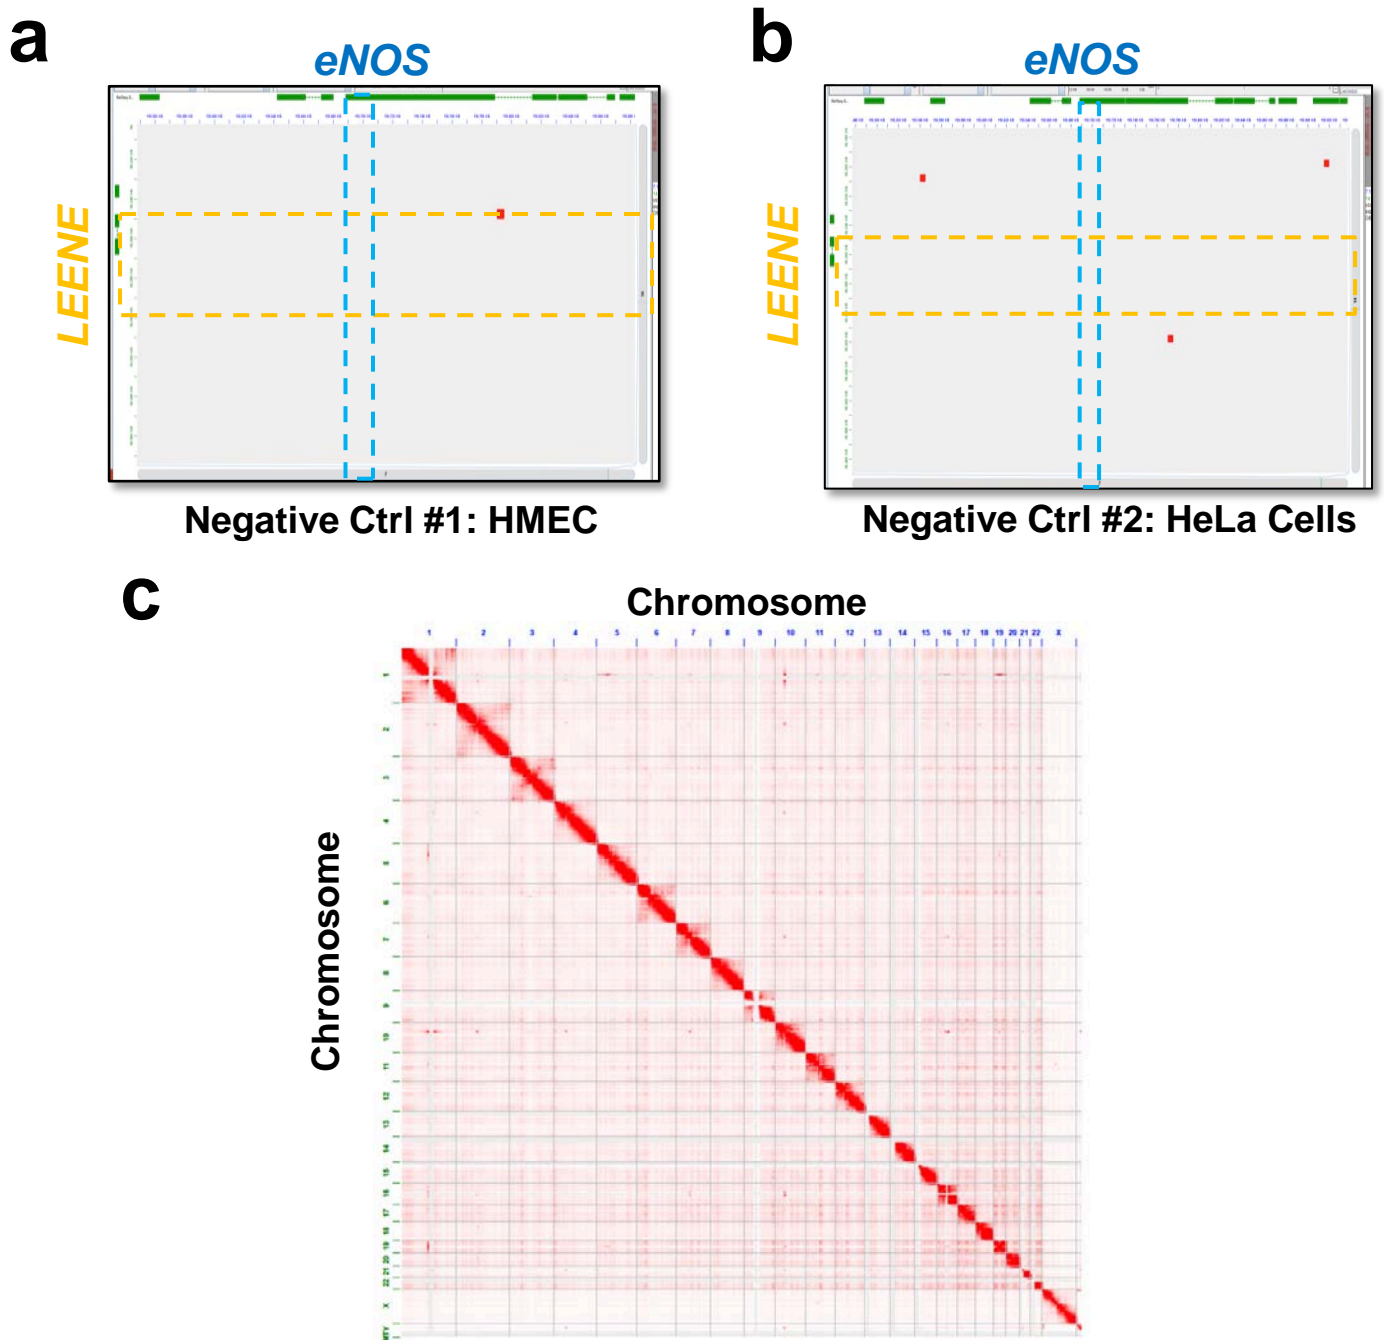

**Supplementary Figure 4:** *LEENE*-*eNOS* interaction map generated from Hi-C data from human mammary epithelial cells HMEC (a) or HeLa cells. Red pixels represent interactions between two regions respectively in chr 7 (X axis) and chr 14 (Y axis). The highlighted regions correspond to *eNOS* promoter and *LEENE* enhancer regions. Note that no red pixel was shown in the overlapped highlighted region. (c) A genome-wide contact matrix produced by Hi-C. Each pixel represents a chromosomal interaction using 5-kb windows; intensity corresponds to the total number of reads.

## Supplementary Figure 5

### Histone ChIP-seq tracks of *eNOS* promoter/enhancer region from four different cell types

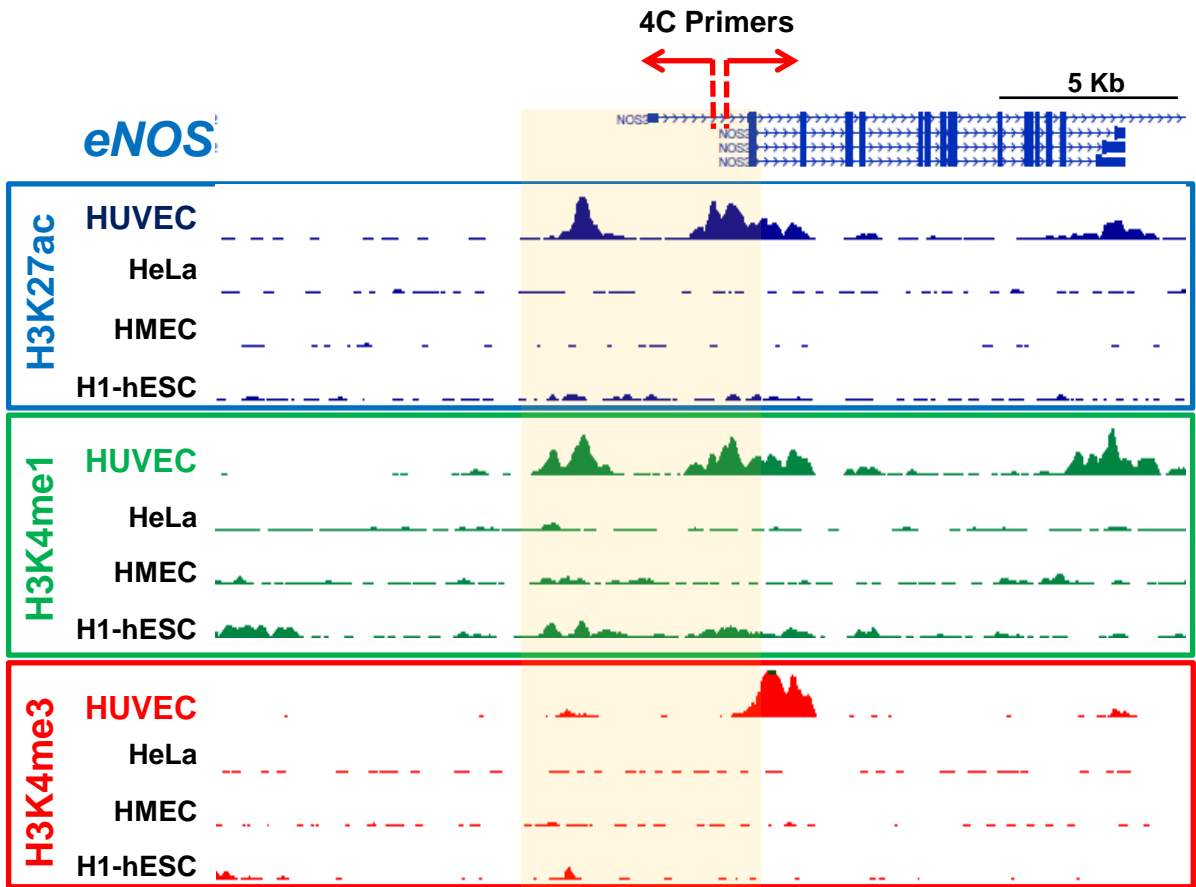

Hg19, Chr7:150,677,000-150,703,000

**Supplementary Figure 5:** ENCODE histone ChIP-seq signal from four different cell types surrounding *eNOS* promoter/enhancer region. Shaded area indicates *eNOS* promoter/enhancer regions. The red arrows indicate 4C library primers directions and locations. HMEC, human mammary epithelial cells; H1-hESC, human embryonic stem cells.

## Supplementary Figure 6

### Quality control of CRISPR-Cas9 gene editing

**a**

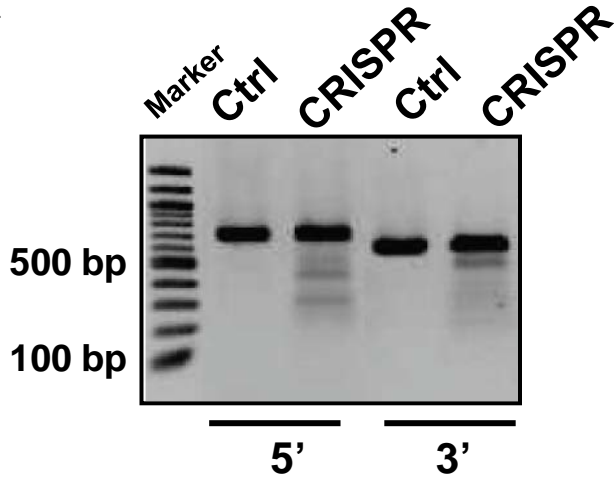

**b**

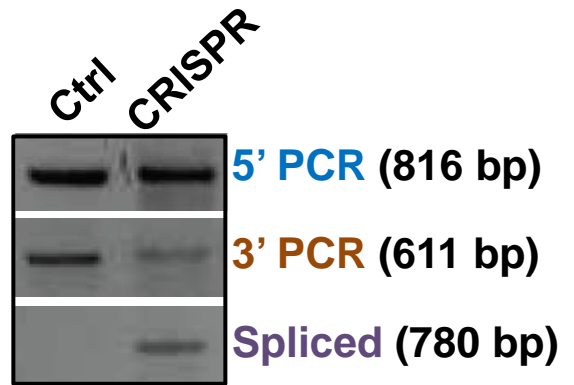

**c**

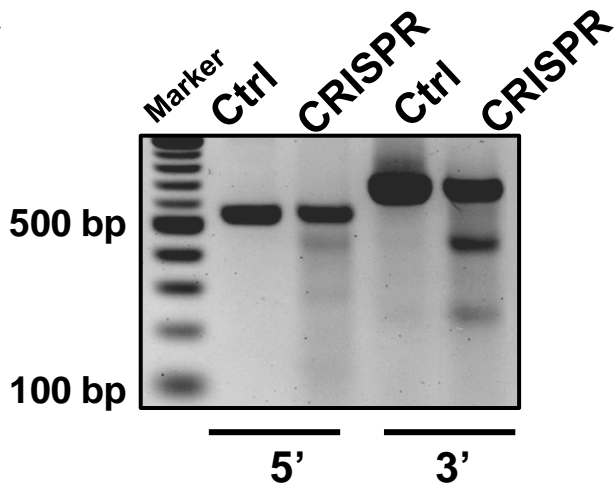

**Supplementary Figure 6:** Quality control of CRISPR-Cas9 gene editing system targeting *LEENE* promoter/enhancer (ED) (a and b) and coding region (CD) (c). (a) Surveyor assay for ED sgRNA-guided cas9 cutting efficacy in HEK293 cells. Select sgRNAs targeting respectively 5' or 3' ends were used to test the cutting efficiency as compared to control vector. (b) PCR validation of ED region of Cas9 targeting position as illustrated in Fig. 4a. The spliced and ligated 10 kb region is amplified in CRISPR-targeted but not control ECs. (c) Surveyor assay for CD sgRNA-guided cas9 cutting efficacy in HEK293 cells. Select sgRNAs targeting respectively 5' or 3' ends were used to test the cutting efficiency as compared to control vector.

## Supplementary Figure 7

### Effect of LEENE knock-down on eNOS mRNA level in HAoECs

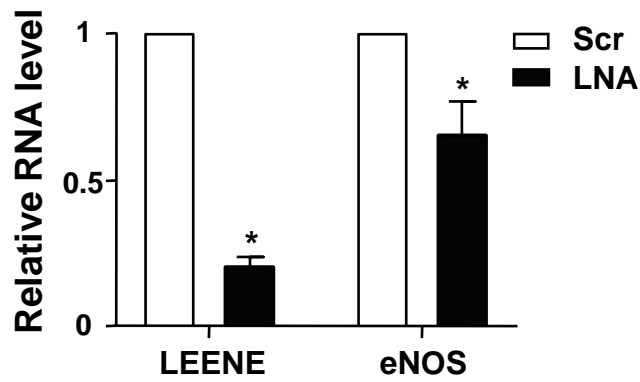

**Supplementary Figure 7:** Knock down of LEENE with LNA decreased mRNA expression of eNOS in HAoECs. Error bars represent mean ± SEM, n=5/group. Student's *t*-test is applied, \**p*<0.05.

## Supplementary Figure 8

### Effect of LEENE knock-down on pro-inflammatory gene expression

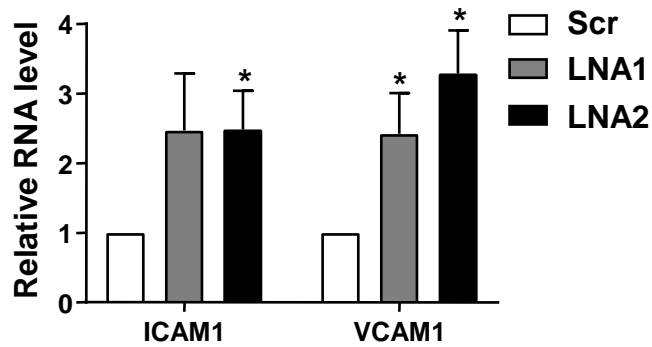

**Supplementary Figure 8:** Knockdown of LEENE with LNAs induced ICAM1 and VCAM1 mRNA levels in HUVECs. Error bars represent mean ± SEM, n=5/group. ANOVA followed by Bonferroni post-test is applied, \* $p < 0.05$ .



## Supplementary Figure 9

### Densitometry quantification of Western Blot experiments

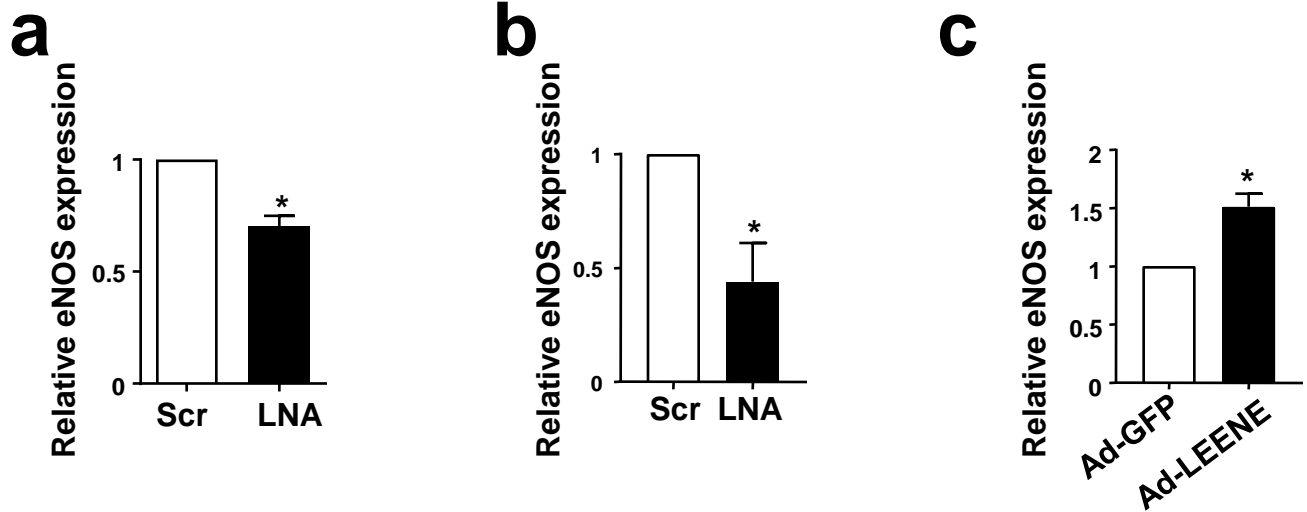

**Supplementary Figure 9:** a: Fig. 5b, under statin treatment; b: Fig. 5b, under PS condition; c: Fig. 5f. Error bars represent mean $\pm$ SEM, n=5/group. Student's *t*-test is applied, \* $p$ <0.05.

# Supplementary Figure 10

## Overexpression of LEENE using adenovirus

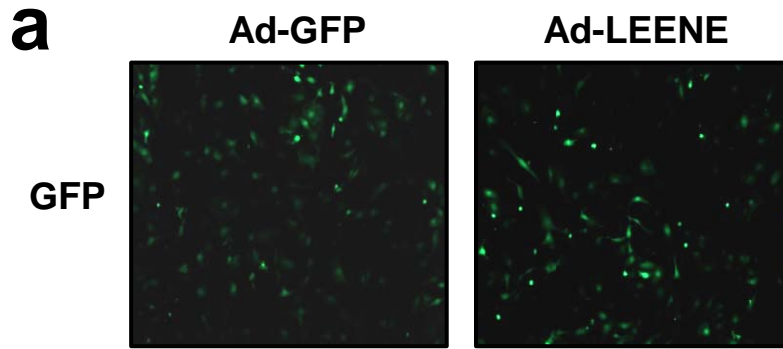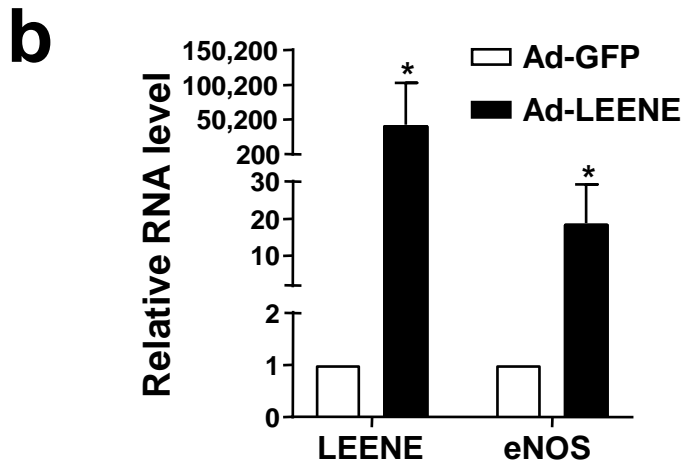

**Supplementary Figure 10:** (a) GFP images from HUVECs infected with Ad-GFP or Ad-LEENE adenovirus. (b) LEENE and eNOS RNA/mRNA in HAoEC infected with Ad-GFP or Ad-LEENE. Error bars represent mean $\pm$ SEM, n=5/group. Student's *t*-test is applied, \* $p$ <0.05.

## Supplementary Figure 11

### IgG isotype control for the RIP assay

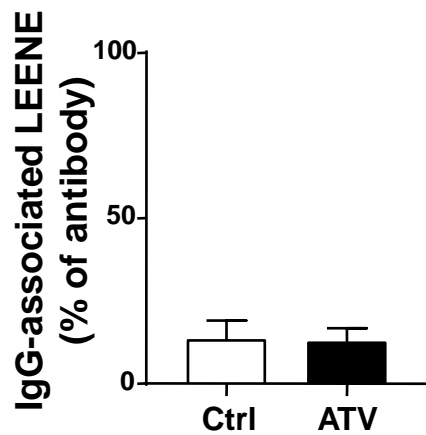

**Supplementary Figure 11:** Error bars represent mean $\pm$ SEM, n=5/group. Student's *t*-test is applied.

# Supplementary Figure 12

## Quality and negative controls of LEENE ChIRP assay.

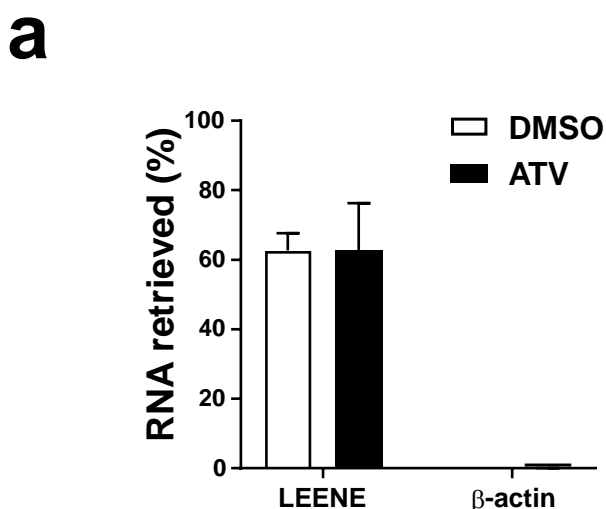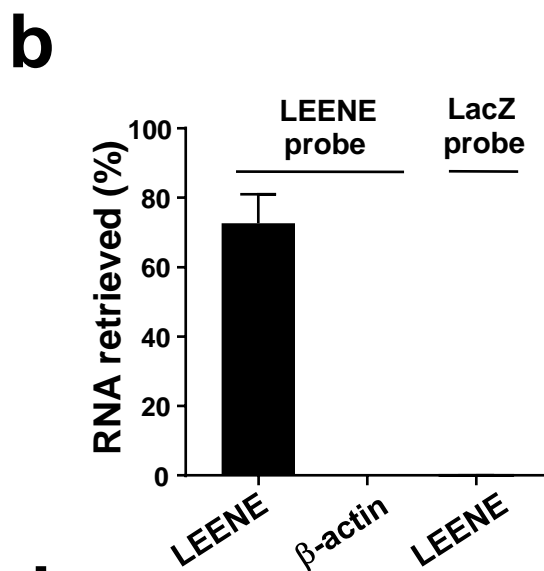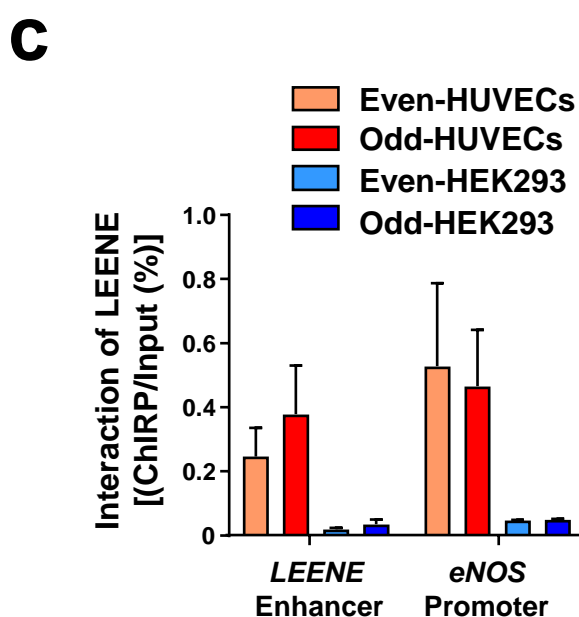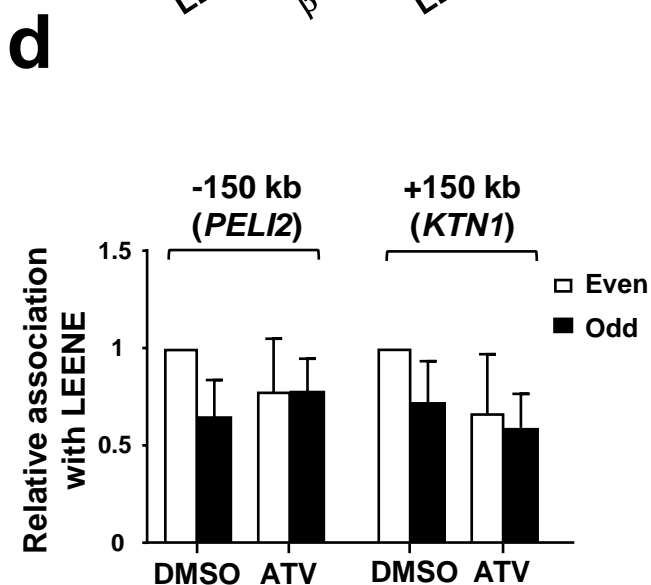

**Supplementary Figure 12:** (a) RNA retrieval rate using LEENE probe under DMSO or atorvastatin (ATV) treatment, quantified by qPCR. (b) RNA retrieval rate using LEENE or LacZ probe to pull-down LEENE RNA or  $\beta$ -actin under basal condition (DMSO). (c) LEENE ChIRP assay detecting LEENE RNA and *LEENE* enhancer/*eNOS* promoter region interactions using HUVECs or HEK293 cells. Error bars represent mean  $\pm$  SEM,  $n=5$ /group. (d) LEENE ChIRP qPCR detection of 150 kb up- an downstream regions respectively encoding *PELI2* and *KTN1*. Error bars represent mean  $\pm$  SEM,  $n=5$ /group. ANOVA followed by Bonferroni post-test is applied.

## Supplementary Figure 13

### Effect of LEENE depletion on KLF4/Med1 binding to eNOS promoter

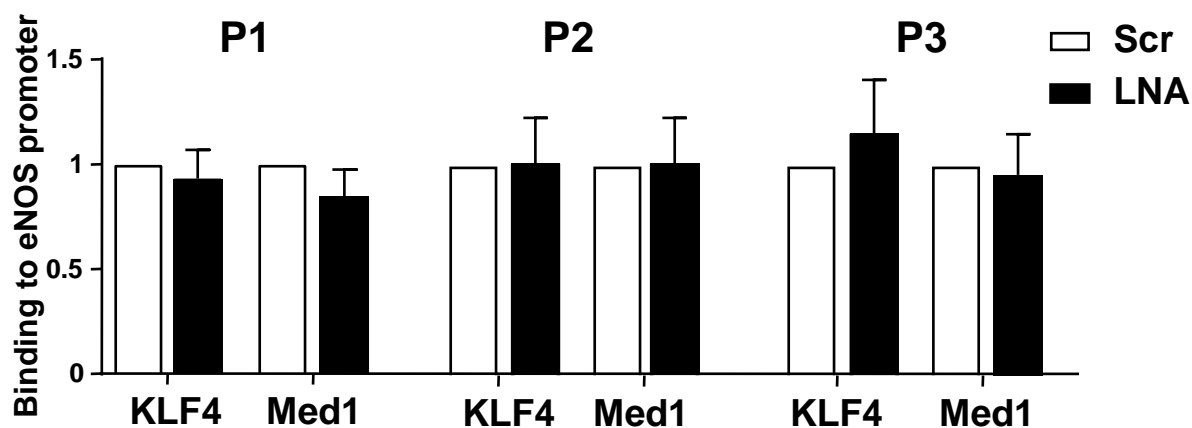

**Supplementary Figure 13:** KLF4 and Med1 were immunoprecipitated from ECs transfected with scramble LNA or LEENE LNA and their bindings to eNOS promoter region were detected by qPCR. Error bars represent mean $\pm$ SEM, n=5/group. Student's *t*-test is applied.

## Supplementary Figure 14

***LEENE* enhancer is prerequisite to *LEENE* RNA-eNOS locus association and *LEENE* RNA is not sufficient to enhance eNOS level**

**a**

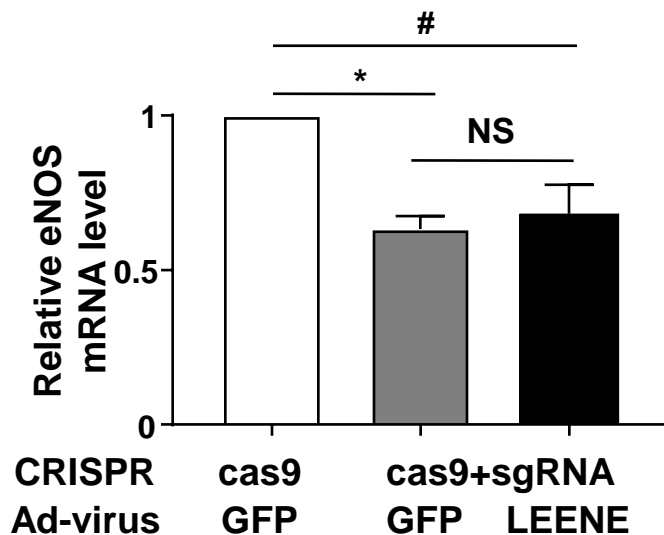

**b**

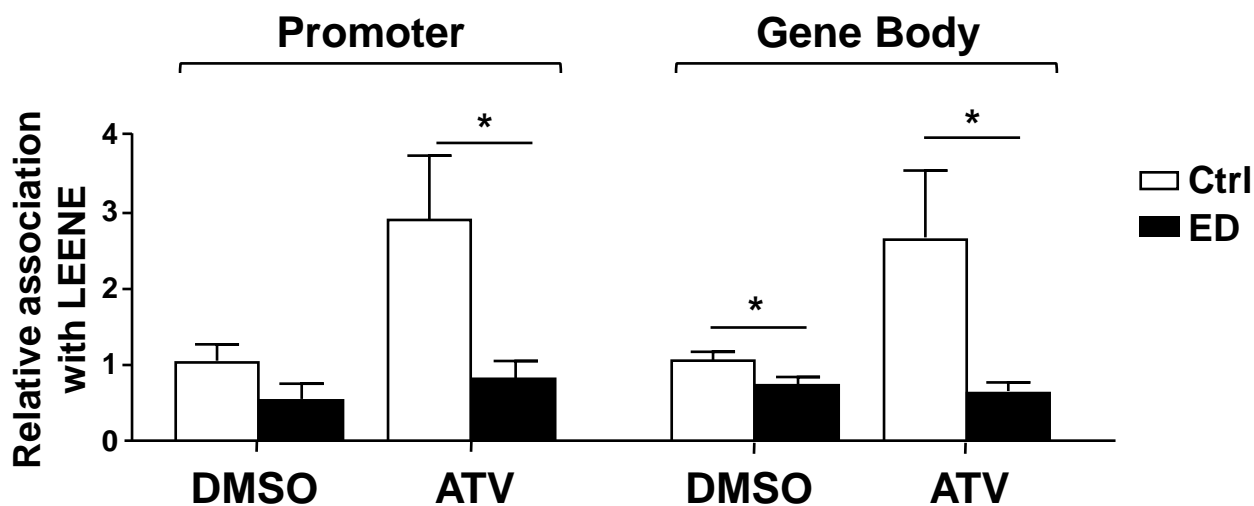

**Supplementary Figure 14:** (a) HUVECs were transfected with control (Ctrl) cas9 plasmid or Cas9-sgRNA targeting *LEENE* enhancer region (CRISPR-ED) 24 hr before infection with Ad-GFP or Ad-LEENE for another 48 hr. eNOS mRNA level was quantified by qPCR. (b) ChIRP detection of eNOS genomic locus binding with LEENE RNA in ECs transfected with Cas9 and sgRNA targeting the enhancer of *LEENE* and treated with DMSO or ATV. Error bars represent mean $\pm$ SEM, n=5/group. ANOVA followed by Bonferroni post-test is applied, \*, # $p$ <0.05.

# Supplementary Figure 15

## Pathway enrichment analysis of *LEENE* interactome

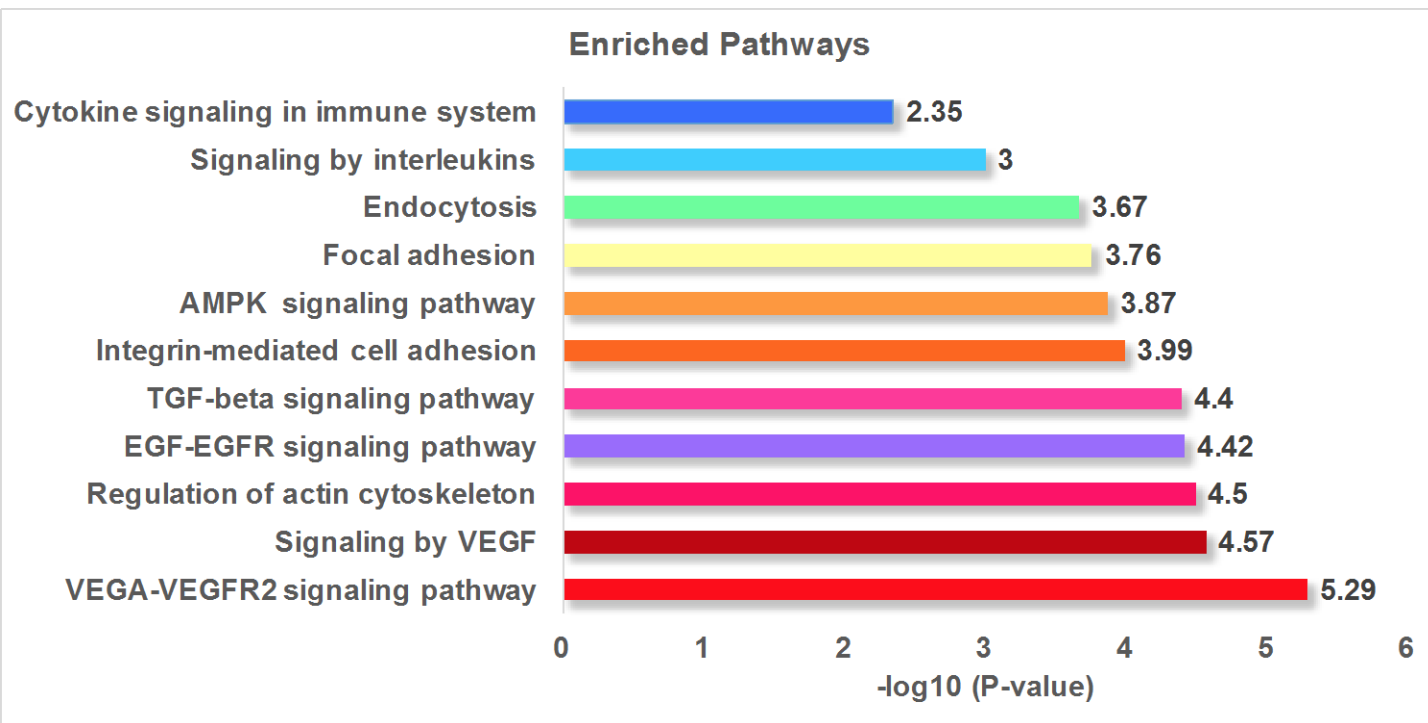

**Supplementary Figure 15:** Pathway enrichment analysis from 1177 genes that are differentially regulated by PS/OS and interact with *LEENE* genomic loci.

## Supplementary Figure 16

### Effect of LEENE knock-down or overexpression on Tm mRNA level

**a**

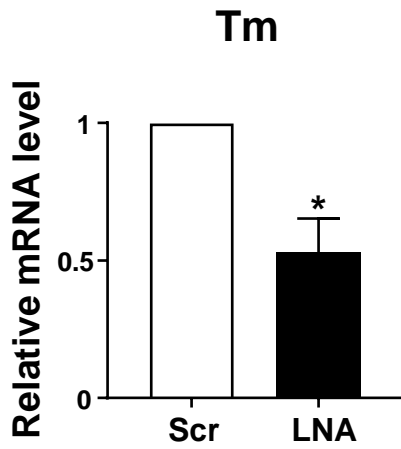

**b**

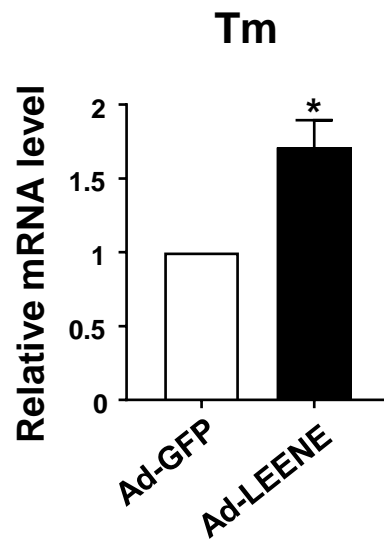

**Supplementary Figure 16:** Inhibition of LEENE by LNA decreased (a), while LEENE overexpression increased thrombomodulin mRNA level (b). Error bars represent mean ± SEM, n=5/group. Student's *t*-test is applied, \**p*<0.05.



## Supplementary Figure 17

### Hi-C analysis of *LEENE-Tm* interaction map in HUVECs

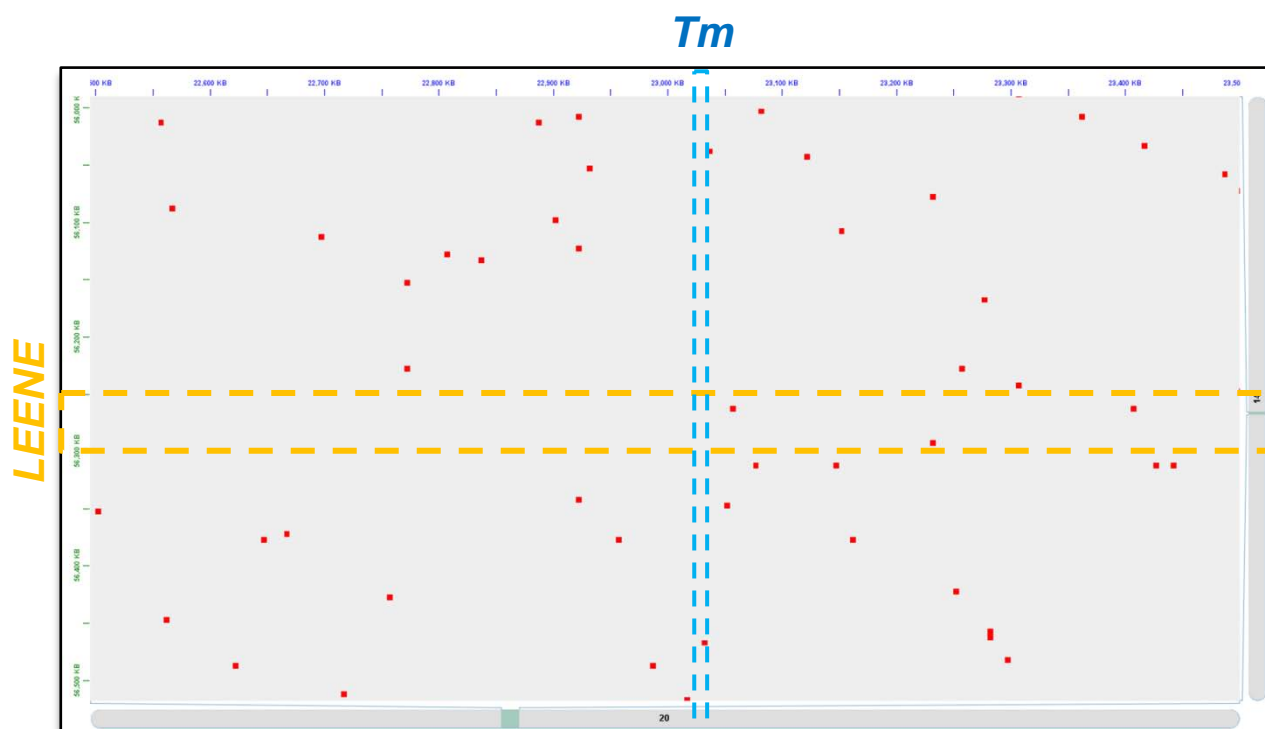

**Supplementary Figure 17:** *LEENE-Tm* interaction map generated from Hi-C data from HUVECs. Red pixels represent interactions between two regions respectively in chr 20 (X axis) and chr 14 (Y axis). The highlighted regions correspond to *Tm* promoter and *LEENE* enhancer regions. Note that no red pixel was shown in the overlapped highlighted region.

# Supplementary Figure 18

## Detailed gene information of 4C-seq circoplot

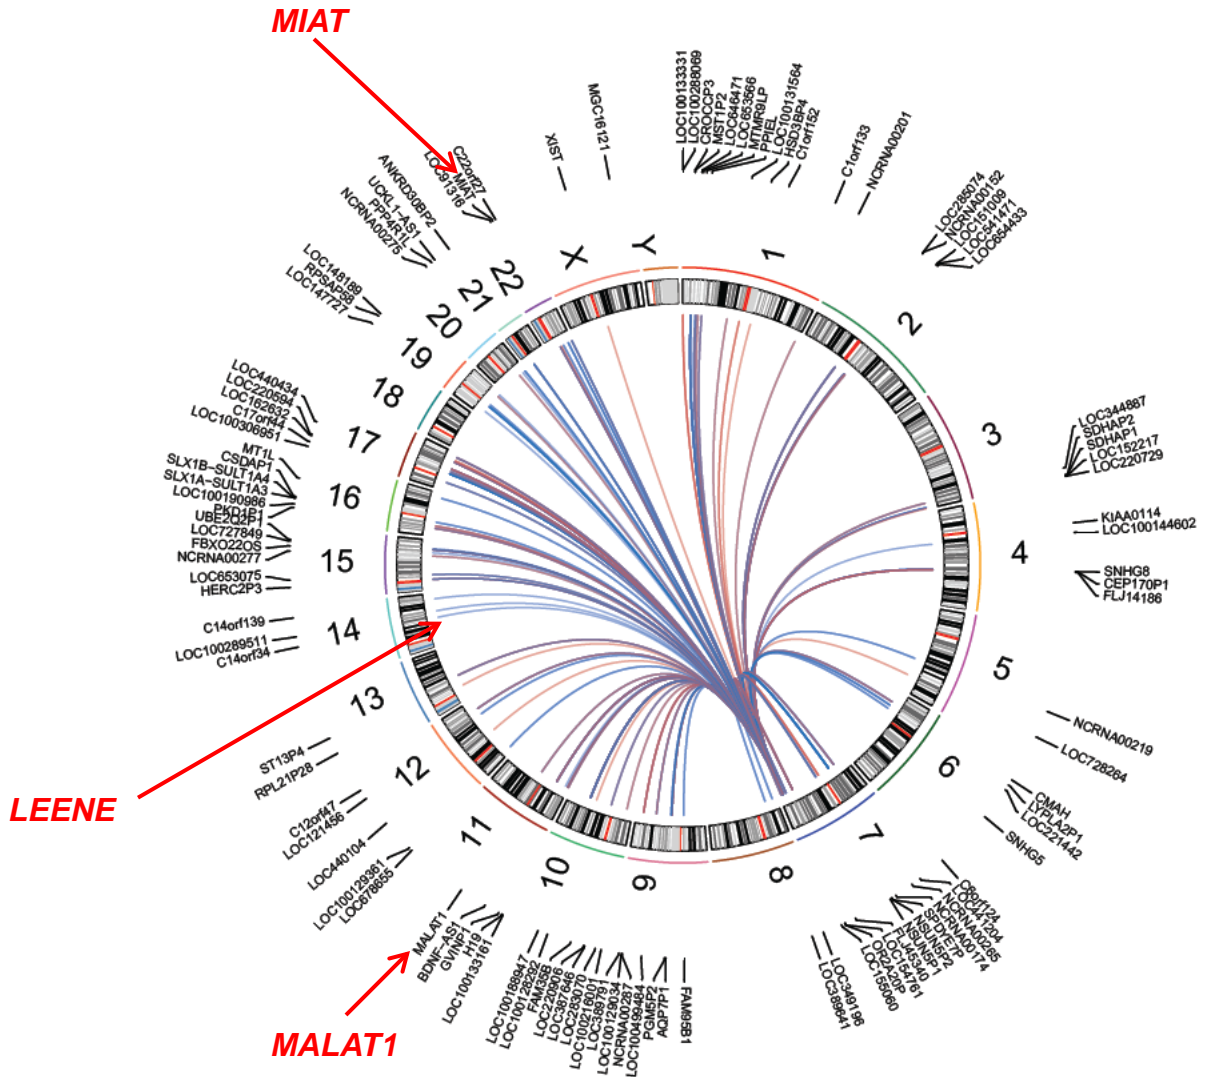

**Supplementary Figure 18:** Detailed gene information of Fig. 3g. Each line in circoplot depicts a chromosomal interaction between lncRNAs (identified in Fig. 1b) and eNOS bait as revealed by 4C-seq. Blue lines: PS; red lines: OS.

# Supplementary Figure 19

## Original uncropped scan of western blots

Fig. 5b

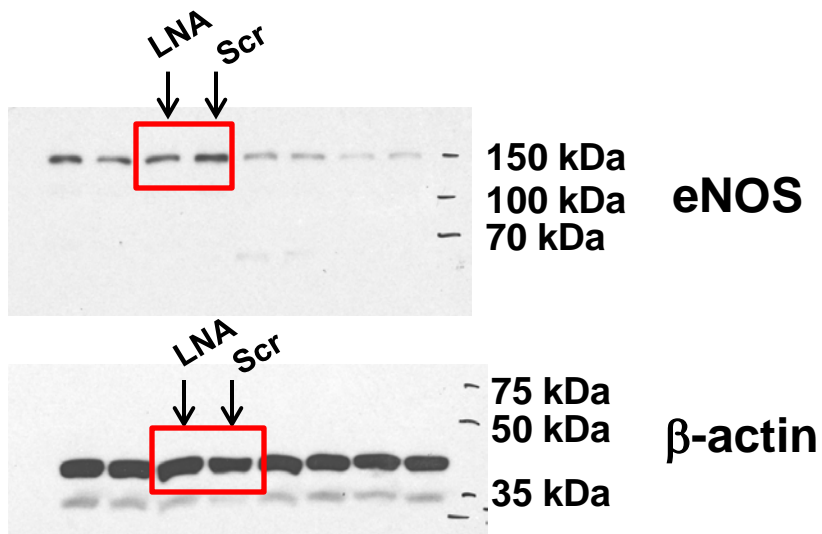

Supplementary Figure 19: Original uncropped scan of blots for Fig. 5b, left side 'ATV'

# Supplementary Figure 20

## Original uncropped scan of western blots

Fig. 5b

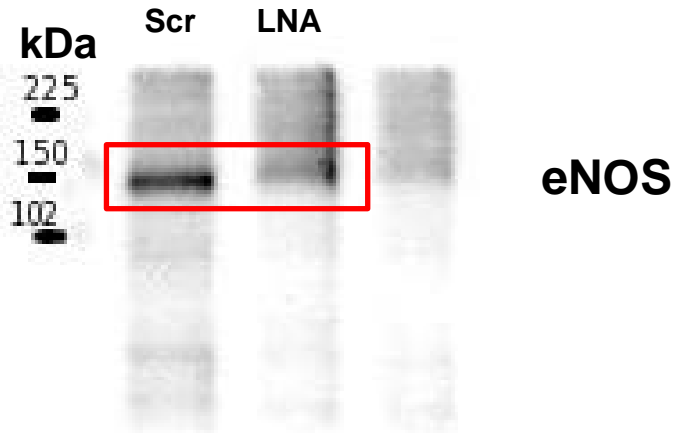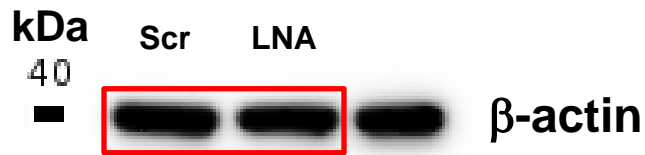

Supplementary Figure 20: Original uncropped scan of blots for Fig. 5b, right side 'PS'

# Supplementary Figure 21

## Original uncropped scan of western blots

Fig. 5f

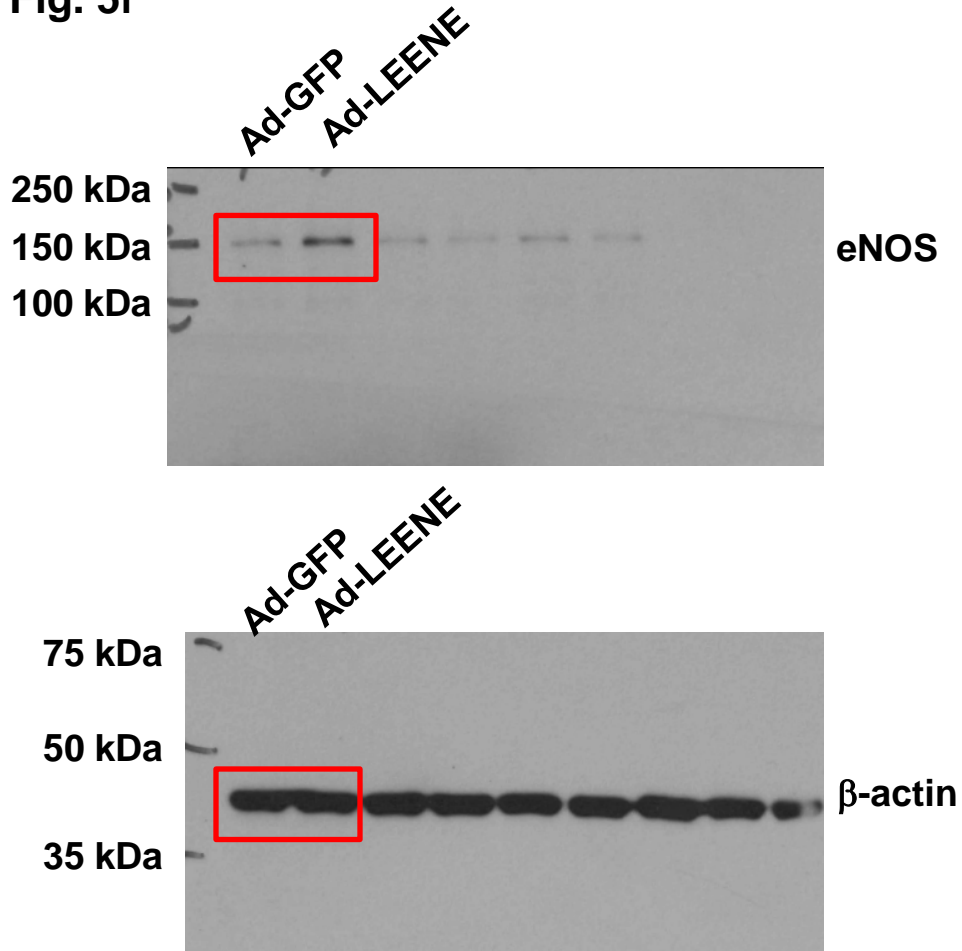

Supplementary Figure 21: Original uncropped scan of blots for Fig. 5f

**Supplementary Table 1 Human primer sequences**

| <b>Name (Human)</b>                | <b>Forward</b>                 | <b>Reverse</b>                          |
|------------------------------------|--------------------------------|-----------------------------------------|
| <b>qPCR primer</b>                 |                                |                                         |
| LINC00520 (LEENE)                  | TTCCCTCTTTGGGGTCTCA            | GCCCTTTGATGAGTGAGTCG                    |
| eNOS                               | TGATGGCGAAGCGAGTGAAG           | ACTCATCCATACACAGGACCC                   |
| KLF2                               | CATGTGCCGTTTCATGTGC            | GCAAGACCTACACCAAGAGTTCCG                |
| KLF4                               | CCCACATGAAGCGACTTCCC           | CAGGTCCAGGAGATCGTTGAA                   |
| VCAM1                              | GTCAATGTTGCCCCAGAGA            | TTTTCGGAGCAGGAAAGCCC                    |
| ICAM1                              | GTGTCCTGTATGGCCCCGACT          | ACCTTGCGGGTGACCTCCCC                    |
| ACTB                               | CATGTACGTTGCTATCCAGGC          | CTCCTTAATGTCACGCACGAT                   |
| MALAT1                             | GTGCTACACAGAAGTGGATTC          | CCTCAGTCCTAGCTTCATCA                    |
| DANCR                              | AGGAGTTCGTCTTTACGTCT           | TGAAATACCAGCAACAGGACA                   |
| CasC7                              | GAGGCTGACCTAACTGCTATC          | CCACTACAGGAACTGAACTGAC                  |
| TUG1                               | CTGTGACCCAGAAGAGTTAAG          | CATATCCCAGGGACTCAAAC                    |
| KTN1                               | AAGGAAAGGCAGCAACAGGT           | CTGACCCTGAAGTTCAGGCC                    |
| Tm                                 | ACCTTCCTCAATGCCAGTCAG          | CGTCGCCGTTCAGTAGCAA                     |
| <b>4C primer</b>                   |                                |                                         |
| eNOS 4C Primer                     | AGGACTCAAGGGTGGGGATC           | GCAGGTCAGCAGAGAGACTA                    |
| <b>H3K27ac ChIP-qPCR primer</b>    |                                |                                         |
| Region I                           | GGCCAATGCATTTGACCTCC           | GCTTGTTGGCCACCTGATTT                    |
| Region II                          | CGGTCACCTGCCTGACATCT           | GGGCACAGTGATCCACTTCA                    |
| Region III                         | ACTGACACTGAGCTCTCCCT           | CCCAGCCGGGATTTACCTTT                    |
| Region IV                          | ACCTTTGCTACCGGAACTCG           | GAGAGAGAACGTGACGTGGG                    |
| <b>ChIP-qPCR primer</b>            |                                |                                         |
| <b>KLF4 ChIP</b>                   |                                |                                         |
| eNOS Promoter                      | GCCCAGCAAGGATGTAGTGA           | GTGTGGGGTTCCAGGAAAT                     |
| LEENE P1                           | CAGCCTCGTACACAGAAGCT           | AACTCATTCCATCTTTAACCTGC                 |
| LEENE P2                           | CTGGTTTCAAACCTCGTGGCT          | AACGTAGATAGGAGGCCAGG                    |
| LEENE P3                           | GATAGGGCCTGGTGAATTGC           | TTATGGAAGGAAGGGCAGGG                    |
| LEENE P4                           | CCATGGCTTTGAAACTGCC            | GCAAAGACAACCACCCTGTA                    |
| <b>Pol II, KLF4, and Med1 ChIP</b> |                                |                                         |
| eNOS Promoter P1                   | ATCCCCTGCTACAGAAACGG           | AGCCACCAGGGGGTCATAAA                    |
| eNOS Promoter P2                   | GCCCAGCAAGGATGTAGTGA           | GTGTGGGGTTCCAGGAAAT                     |
| eNOS Promoter P3                   | GCCGAACACCAAATCTCCAAC          | AGCCCTGCCAAGAATGATGC                    |
| <b>ChIRP-qPCR primer</b>           |                                |                                         |
| LEENE Enhancer                     | CAGCCCTCATGTATCCCC             | GTGCTATGGAAGGTGGCGTA                    |
| eNOS Promoter                      | GCCGAACACCAAATCTCCAAC          | AGCCCTGCCAAGAATGATGC                    |
| eNOS Gene Body                     | AACACATAGGCCCTGATTGGG          | TGATGATGTGGTCTCATCCCG                   |
| 150 Upstream (KTN1)                | AGAGGTGATAGTGAAGAATGACT        | CAGAAGACAGGTGAAAGGGT                    |
| 150 Downstream (PEIL2)             | GAAAGAGGCTGTGAGGATGA           | TTTCAACTCAGCTGCTATGC                    |
| <b>CRISPR PCR primer</b>           |                                |                                         |
| 5' site                            | CAATGATAGGCTGGATTAAGAAAATGTGGC | GATGTTCTGATAAAATCATTGCAATCTGGGC         |
| 3' site                            | TGTCATGGGAGGGACTGAATGG         | GGCCACATATTGTATGATTCCATTTATATGAG<br>ATG |
| Spliced region                     | CAATGATAGGCTGGATTAAGAAAATGTGGC | GGCCACATATTGTATGATTCCATTTATATGAG<br>ATG |

## Supplementary Table 2 Mouse primer sequences

| Name (Mouse)       | Forward              | Reverse               |
|--------------------|----------------------|-----------------------|
| <b>qPCR primer</b> |                      |                       |
| BY707159.1 EST     | GGACCTCTGGCTAAGGTGAG | TCCTTGCTTGTCCTGTCAGT  |
| eNOS               | CACCTACGACACCCTCAGTG | CTTGACCCAATAGCTGCTCAG |

### Supplementary Table 3 sgRNA sequences

| sgRNA name | Sequence             |
|------------|----------------------|
| ED_5'-1    | ATGGGTGCAACACACCAACA |
| ED_5'-3    | GGTGGGGAACATCACACACT |
| ED_5'-6    | GAGGGGGGAGGGATAGCATT |
| ED_3'-7    | GTCATATCTTACATGGCAGA |
| ED_3'-9    | GAGCACAGTCATATCTTACA |
| CD_5'-1    | TACCATAACACTAGACCAGC |
| CD_5'-2    | GCTCTCAGTCATTATATGAT |
| CD_5'-3    | AGTAAAATCACCCCGTGTAG |
| CD_3'-1    | GAAACCCCGAGCCAAACGTA |
| CD_3'-2    | TGTGTTACGGTCTTCAATGG |
| CD_3'-3    | CAGCCTCCATTGAAGACCGT |



### Supplementary Table 4 LEENE LNA-GapmeRs sequences

|                 | <b>Sequence</b>  | <b>Position (NR_026797)</b> |
|-----------------|------------------|-----------------------------|
| <b>LNA-1</b>    | TTTGATGAGTGAGTCG | 218-233                     |
| <b>LNA-2</b>    | GTTACGGTCTTCAATG | 1628-1643                   |
| <b>Scramble</b> | AACACGTCTATACGC  |                             |

### Supplementary Table 5 LEENE ChIRP probe sequences

| <b>Number</b> | <b>Sequence</b>      | <b>Position</b> |
|---------------|----------------------|-----------------|
| 1             | ATAGAATCTTGCTTGGGCAG | 170-198         |
| 2             | CTGAGTGGATTGTAGGTGTT | 443-462         |
| 3             | TCCTGTCTTCTTACTTGTAC | 629-648         |
| 4             | CCCCAAAATCCTTTAAGGTA | 927-946         |
| 5             | TGTCTCTGGGAAGAGGAGAG | 1072-1091       |
| 6             | TGGATGTAAAGACTGGTGCC | 1173-1192       |
| 7             | CTGAGCTGTAGAATCCACAG | 1277-1296       |
| 8             | CTGACATCTCATCAAGGGAG | 1377-1396       |
| 9             | GCTCATCAAGAAGCAGCTAG | 1488-1507       |
| 10            | AGTCACAAGAAGTCCAAGGC | 1594-1613       |
